# Supplementary figures and images for: Real time observation of ZnO nanostructure formation via the solid–vapor and solid–solid–vapor mechanisms
Source: Royal Society of Chemistry journal article supplement (doi:10.1039/c3nr06628b), 2014-01-01

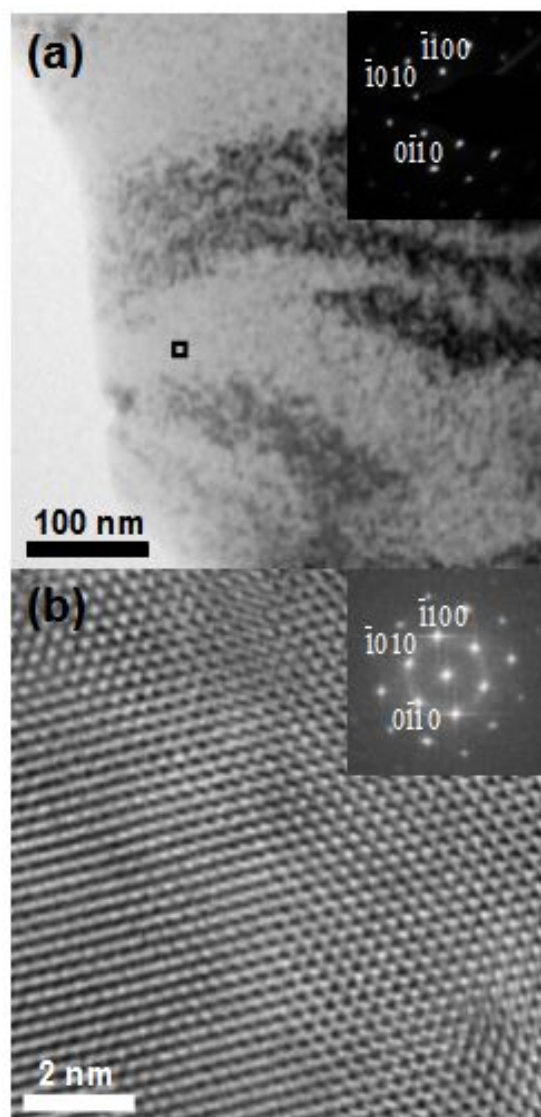

Fig. S1

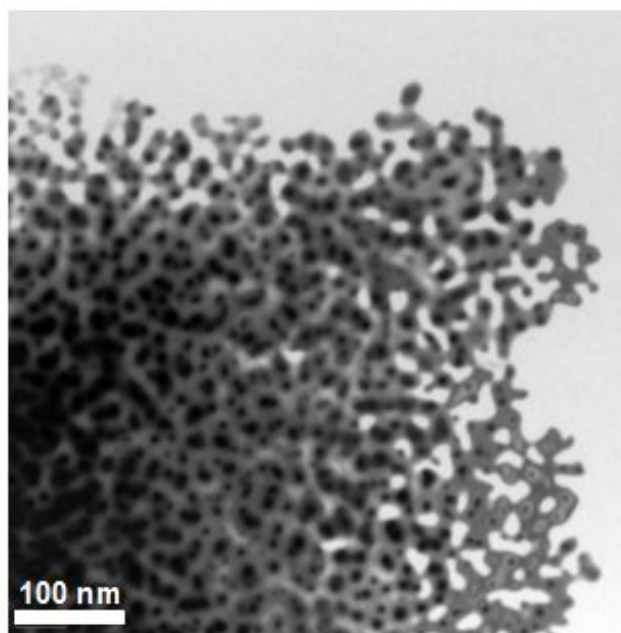

Fig. S2

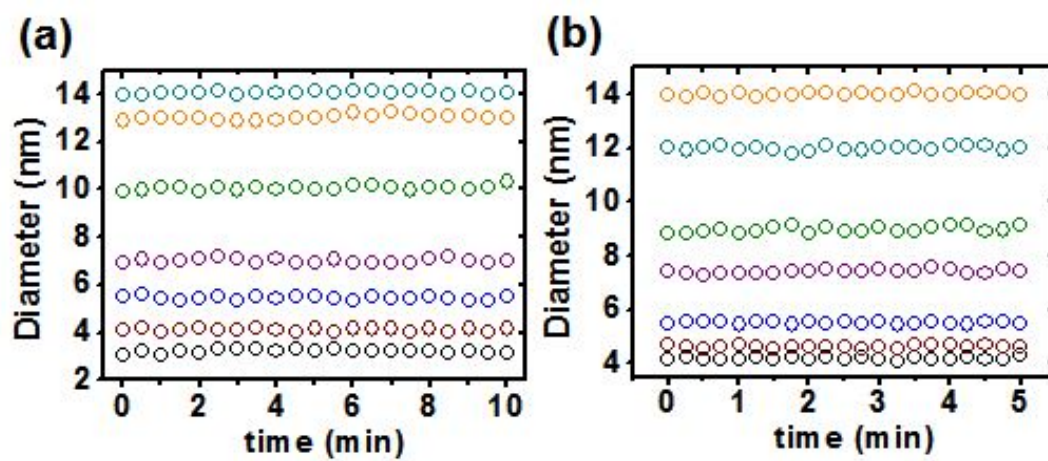

Fig. S3

Supplement: c3nr06628b1.pdf [file c3nr06628b1.pdf]
